# Supplementary material for: Divergent Expression Patterns in Two Vernicia Species Revealed the Potential Role of the Hub Gene VmAP2/ERF036 in Resistance to Fusarium oxysporum in Vernicia montana
Source: MDPI journal article supplement (doi:10.3390/genes7120109), 2016-12-01
Supplement: s1 [file s1]

## Qiyang Zhang, Ming Gao, Liwen Wu, Yangdong Wang and Yicun Chen

**Figure S1.** Alignment of APETALA2/ethylene-responsive element binding factor (AP2/ERF) domains of 124 ERF family proteins identified from *Vernicia fordii* and *Vernicia montana*. Multiple sequence alignment was conducted with BioEdit and DNAMAN. The GCC box-binding domain of *Arabidopsis* AtERF1 (At4g17500) is indicated at the top. **Blue shadow:** conserved amino acid residues (>50%); **Pink shadow:** conserved amino acid residues (>75%); **Black shadow:** 100% conserved amino acid residues.



|              |                                                                                       |     |
|--------------|---------------------------------------------------------------------------------------|-----|
| VfAP2/ERF063 | RSSCYRGVTFYRRGTGRWESHWD.....CGKQVYLGGFTAHAAARAYDRAAKKFRGVDADNFNVSIDYVEDIKQMS          | 72  |
| VfAP2/ERF064 | RSSCYRGVTFYRRGTGRWESHWD.....CGKQVYLGGFTAHAAARAYDRAAKKFRGVDADNFNVSIDYVEDIKQMS          | 72  |
| VfAP2/ERF065 | RSSCYRGVTFYRRGTGRWESHWD.....CGKQVYLGGFTAHAAARAYDRAAKKFRGVDADNFNVSIDYVEDIKQMS          | 72  |
| VfAP2/ERF066 | RSSCYRGVTFYRRGTGRWESHWD.....CGKQVYLGGFTAHAAARAYDRAAKKFRGVDADNFNVSIDYVEDIKQMS          | 72  |
| VfAP2/ERF067 | RSSCYRGVTFYRRGTGRWESHWD.....CGKQVYLGGFTAHAAARAYDRAAKKFRGVDADNFNVSIDYVEDIKQMS          | 72  |
| VfAP2/ERF068 | RSSCYRGVTFYRRGTGRWESHWD.....CGKQVYLGGFTAHAAARAYDRAAKKFRGVDADNFNVSIDYVEDIKQMS          | 72  |
| VfAP2/ERF069 | RTSCYRGVTRFRWGTGRWESHWDNSCKKEGQSRGRQVYLGGYDKEEKAARAYDLAAIKYKGPSTHNNFPLENYKKELEDMK     | 82  |
| VfAP2/ERF070 | RTSCYRGVTRFRWGTGRWESHWDNSCKKEGQSRGRQVYLGGYDKEEKAARAYDLAAIKYKGPSTHNNFPLENYKKELEDMK     | 82  |
| VfAP2/ERF071 | RTSCYRGVTRFRWGTGRWESHWDNSCKKEGQSRGRQVYLGGYDKEEKAARAYDLAAIKYKGPSTHNNFPLENYKKELEDMK     | 82  |
| VfAP2/ERF072 | RTSCYRGVTRFRWGTGRWESHWDNSCKKEGQSRGRQVYLGGYDKEEKAARAYDLAAIKYKGPSTHNNFPLENYKKELEDMK     | 82  |
| VfAP2/ERF073 | RTSCYRGVTRFRWGTGRWESHWDNSCKKEGQSRGRQVYLGGYDKEEKAARAYDLAAIKYKGPSTHNNFPLENYKKELEDMK     | 82  |
| VfAP2/ERF074 | RTSCYRGVTRFRWGTGRWESHWDNSCKKEGQSRGRQVYLGGYDKEEKAARAYDLAAIKYKGPSTHNNFPLENYKKELEDMK     | 82  |
| VmAP2/ERF067 | RTSCYRGVTRFRWGTGRWESHWDNSCKKEGQSRGRQVYLGGYDKEEKAARAYDLAAIKYKGPSTHNNFPLENYKKELEDMK     | 82  |
| VmAP2/ERF068 | RTSCYRGVTRFRWGTGRWESHWDNSCKKEGQSRGRQVYLGGYDKEEKAARAYDLAAIKYKGPSTHNNFPLENYKKELEDMK     | 82  |
| VmAP2/ERF069 | RSSCYRGVTFYRRGTGRWESHWD.....CGKQVYLGGFTAHAAARAYDRAAKKFRGVDADNFNVSIDYVEDIKQMS          | 72  |
| VmAP2/ERF070 | RSSCYRGVTFYRRGTGRWESHWD.....CGKQVYLGGFTAHAAARAYDRAAKKFRGVDADNFNVSIDYVEDIKQMS          | 72  |
| VmAP2/ERF071 | RSSCYRGVTFYRRGTGRWESHWD.....CGKQVYLGGFTAHAAARAYDRAAKKFRGVDADNFNVSIDYVEDIKQMS          | 72  |
| VmAP2/ERF072 | RSSCYRGVTFYRRGTGRWESHWD.....CGKQVYLGGFTAHAAARAYDRAAKKFRGVDADNFNVSIDYVEDIKQMS          | 72  |
| VmAP2/ERF073 | RSSCYRGVTFYRRGTGRWESHWD.....CGKQVYLGGFTAHAAARAYDRAAKKFRGVDADNFNVSIDYVEDIKQMS          | 72  |
| VmAP2/ERF074 | RSSCYRGVTRFRWGTGRWESHWDKNCWNESQNKGRQVYLGGYDKEEKAARAYDLAAIKYKGPSTHNNFPLENYKKELEDMK     | 82  |
| VmAP2/ERF075 | RSSCYRGVTRFRWGTGRWESHWDKNCWNESQNKGRQVYLGGYDKEEKAARAYDLAAIKYKGPSTHNNFPLENYKKELEDMK     | 82  |
| VmAP2/ERF076 | RSSCYRGVTRFRWGTGRWESHWDKNCWNESQNKGRQVYLGGYDKEEKAARAYDLAAIKYKGPSTHNNFPLENYKKELEDMK     | 82  |
| VmAP2/ERF077 | RTSCYRGVTRFRWGTGRWESHWDNSCKKEGQSRGRQVYLGGYDKEEKAARAYDLAAIKYKGPSTHNNFPLENYKKELEDMK     | 82  |
| VmAP2/ERF078 | RTSCYRGVTRFRWGTGRWESHWDNSCKKEGQSRGRQVYLGGYDKEEKAARAYDLAAIKYKGPSTHNNFPLENYKKELEDMK     | 82  |
| VmAP2/ERF079 | RTSCYRGVTRFRWGTGRWESHWDNSCKKEGQSRGRQVYLGGYDKEEKAARAYDLAAIKYKGPSTHNNFPLENYKKELEDMK     | 82  |
| VmAP2/ERF080 | RSSCYRGVTFYRRGTGRWESHWD.....CGKQVYLGGFTAHAAARAYDRAAKKFRGVDADNFNVSIDYVEDIKQMS          | 72  |
| Consensus    | rsscyrgvtrfrwgtgrweshwd c e q kgrqvylggyd e aaaraydlaalkywg a infp sdyeel erk         |     |
| VfAP2/ERF063 | NFTKEEFVHILRRQSTGFSRGSSSYRGVT.LHKCGRWEARMGQFLGKKYIYLGLEDSEIDAAARAYDKAAIKCNGREAVTNF    | 152 |
| VfAP2/ERF064 | NFTKEEFVHILRRQSTGFSRGSSSYRGVT.LHKCGRWEARMGQFLGKKYIYLGLEDSEIDAAARAYDKAAIKCNGREAVTNF    | 152 |
| VfAP2/ERF065 | SLTKEEFVHILRRQSTGFSRGSSSYRGVT.LHKCGRWEARMGQFLGKKYIYLGLEDSEIDAAARAYDKAAIKCNGREAVTNF    | 135 |
| VfAP2/ERF066 | NLNKEEFVHILRRQSTGFSRGSSSYRGVT.LHKCGRWEARMGQFLGKKYIYLGLEDSEIDAAARAYDKAAIKCNGREAVTNF    | 138 |
| VfAP2/ERF067 | NFTKEEFVHILRRQSTGFSRGSSSYRGVT.LHKCGRWEARMGQFLGKKYIYLGLEDSEIDAAARAYDKAAIKCNGREAVTNF    | 119 |
| VfAP2/ERF068 | NFTKEEFVHILRRQSTGFSRGSSSYRGVT.LHKCGRWEARMGQFLGKKYIYLGLEDSEIDAAARAYDKAAIKCNGREAVTNF    | 152 |
| VfAP2/ERF069 | NMTRCQEVVAHLRRQSSGFSRGASLYRGVTRHHQHGRWQARIGRVAGNKDLYLGTFTSTQEEAAEAYDIAAIFRGLNAVTFN    | 163 |
| VfAP2/ERF070 | NMTRCQEVVAHLRRQSSGFSRGASLYRGVTRHHQHGRWQARIGRVAGNKDLYLGTFTSTQEEAAEAYDIAAIFRGLNAVTFN    | 163 |
| VfAP2/ERF071 | YVTKQEFVHILRRQSSGFSRGASLYRGVTRHHQHGRWQARIGRVAGNKDLYLGTFTSTQEEAAEAYDIAAIFRGLNAVTFN     | 163 |
| VfAP2/ERF072 | HMTRCQEVVAHLRRQSSGFSRGASLYRGVTRHHQHGRWQARIGRVAGNKDLYLGTFTSTQEEAAEAYDIAAIFRGLNAVTFN    | 163 |
| VfAP2/ERF073 | HMTRCQEVVAHLRRQSSGFSRGASLYRGVTRHHQHGRWQARIGRVAGNKDLYLGTFTSTQEEAAEAYDIAAIFRGLNAVTFN    | 163 |
| VfAP2/ERF074 | HMTRCQEVVAHLRRQSSGFSRGASLYRGVTRHHQHGRWQARIGRVAGNKDLYLGTFTSTQEEAAEAYDIAAIFRGLNAVTFN    | 163 |
| VmAP2/ERF067 | HMTRCQEVVAHLRRQSSGFSRGASLYRGVTRHHQHGRWQARIGRVAGNKDLYLGTFTSTQEEAAEAYDIAAIFRGLNAVTFN    | 163 |
| VmAP2/ERF068 | YVTKQEFVHILRRQSSGFSRGASLYRGVTRHHQHGRWQARIGRVAGNKDLYLGTFTSTQEEAAEAYDIAAIFRGLNAVTFN     | 163 |
| VmAP2/ERF069 | NFTKEEFVHILRRQSTGFSRGSSSYRGVT.LHKCGRWEARMGQFLGKKYIYLGLEDSEIDAAARAYDKAAIKCNGREAVTNF    | 152 |
| VmAP2/ERF070 | NFTKEEFVHILRRQSTGFSRGSSSYRGVT.LHKCGRWEARMGQFLGKKYIYLGLEDSEIDAAARAYDKAAIKCNGREAVTNF    | 152 |
| VmAP2/ERF071 | SLTKEEFVHILRRQSTGFSRGSSSYRGVT.LHKCGRWEARMGQFLGKKYIYLGLEDSEIDAAARAYDKAAIKCNGREAVTNF    | 152 |
| VmAP2/ERF072 | NFTKEEFVHILRRQSTGFSRGSSSYRGVT.LHKCGRWEARMGQFLGKKYIYLGLEDSEIDAAARAYDKAAIKCNGREAVTNF    | 152 |
| VmAP2/ERF073 | NFTKEEFVHILRRQSTGFSRGSSSYRGVT.LHKCGRWEARMGQFLGKKYIYLGLEDSEIDAAARAYDKAAIKCNGREAVTNF    | 119 |
| VmAP2/ERF074 | GQSKEEYIGSLRRQSSGFSRGVSYRGVTRHHQHGRWQARIGRVAGNKDLYLGTFTSTQEEAAEAYDIAAIFRGLNAVTFN      | 163 |
| VmAP2/ERF075 | GQSKEEYIGSLRRQSSGFSRGVSYRGVTRHHQHGRWQARIGRVAGNKDLYLGTFTSTQEEAAEAYDIAAIFRGLNAVTFN      | 113 |
| VmAP2/ERF076 | RMSKEEYIGSLRRQSSGFSRGVSYRGVTRHHQHGRWQARIGRVAGNKDLYLGTFTSTQEEAAEAYDIAAIFRGLNAVTFN      | 163 |
| VmAP2/ERF077 | NMTRCQEVVAHLRRQSSGFSRGASLYRGVTRHHQHGRWQARIGRVAGNKDLYLGTFTSTQEEAAEAYDIAAIFRGLNAVTFN    | 163 |
| VmAP2/ERF078 | NMTRCQEVVAHLRRQSSGFSRGASLYRGVTRHHQHGRWQARIGRVAGNKDLYLGTFTSTQEEAAEAYDIAAIFRGLNAVTFN    | 163 |
| VmAP2/ERF079 | HMTRCQEVVAHLRRQSSGFSRGASLYRGVTRHHQHGRWQARIGRVAGNKDLYLGTFTSTQEEAAEAYDIAAIFRGLNAVTFN    | 163 |
| VmAP2/ERF080 | NLNKEEFVHILRRQSTGFSRGSSSYRGVT.LHKCGRWEARMGQFLGKKYIYLGLEDSEIDAAARAYDKAAIKCNGREAVTNF    | 138 |
| Consensus    | n tkeefv hllrrqstgfsrgsssyrgvt l hkcgrwearmgqflgkkyiylglf dseid aaraydkaaikcngreavtnf |     |

**Figure S2.** Alignment of AP2/ERF domains of 26 AP2 family proteins identified from *V. fordii* and *V. montana*. Multiple sequence alignment was conducted with BioEdit and DNAMAN. **Blue shadow:** conserved amino acid residues (>50%); **Pink shadow:** conserved amino acid residues (>75%); **Black shadow:** 100% conserved amino acid residues.

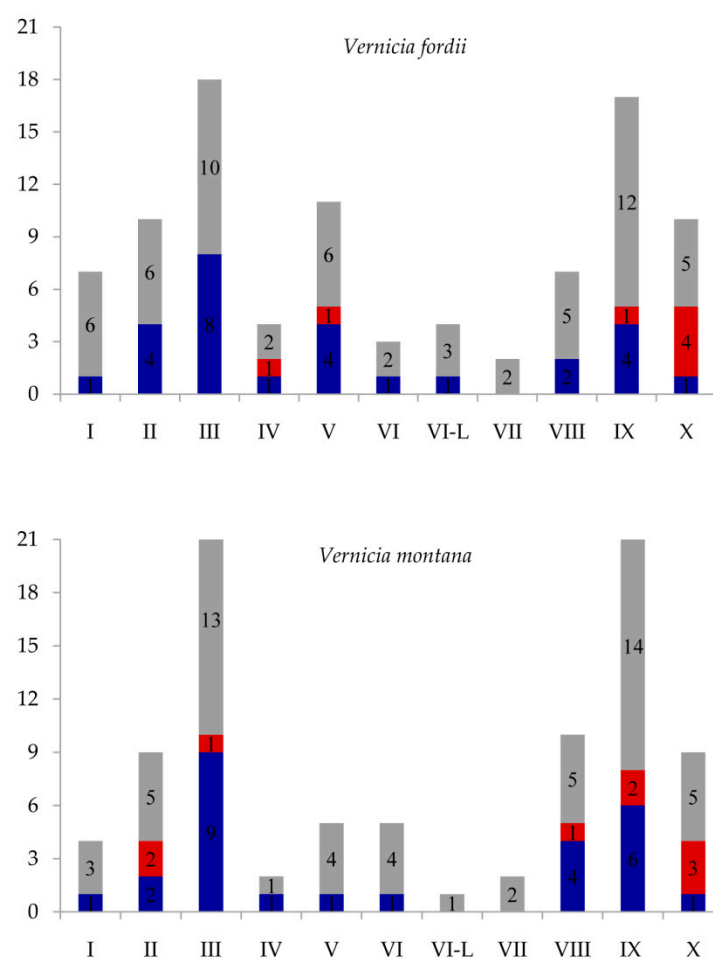

**Figure S3.** Frequency of ERFs in response to *Fusarium oxysporum* in phylogenetic groups. The full bar indicates the number of ERFs with more than twofold change in at least one infected experiment per group. **Red** indicates members with more than twofold upregulated expression at all the three infected periods. **Blue** indicates members with more than twofold downregulated.

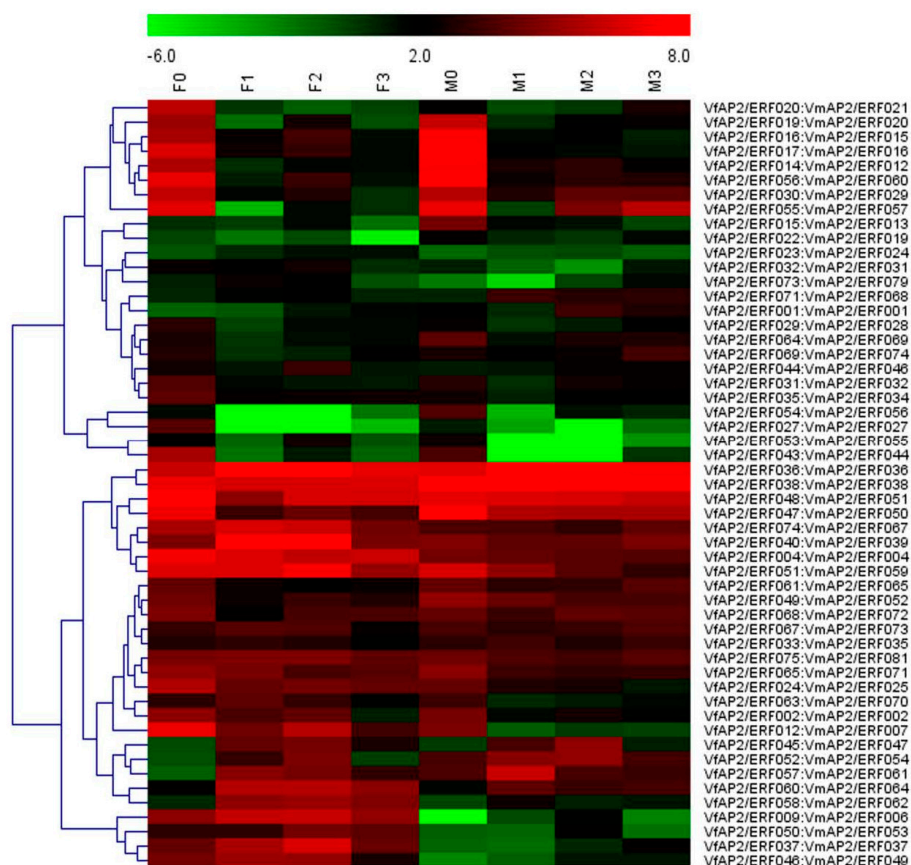

**Figure S4.** Comparative analysis of the expression trends of 53 pairs of orthologous genes in response to *F. oxysporum*. The heat-map has been generated based on the log<sub>2</sub> transformed reads per kilobase per million mapped reads (RPKM) values and the color scale is shown at the top. **Red** represents high expression and **green** represents low expression.

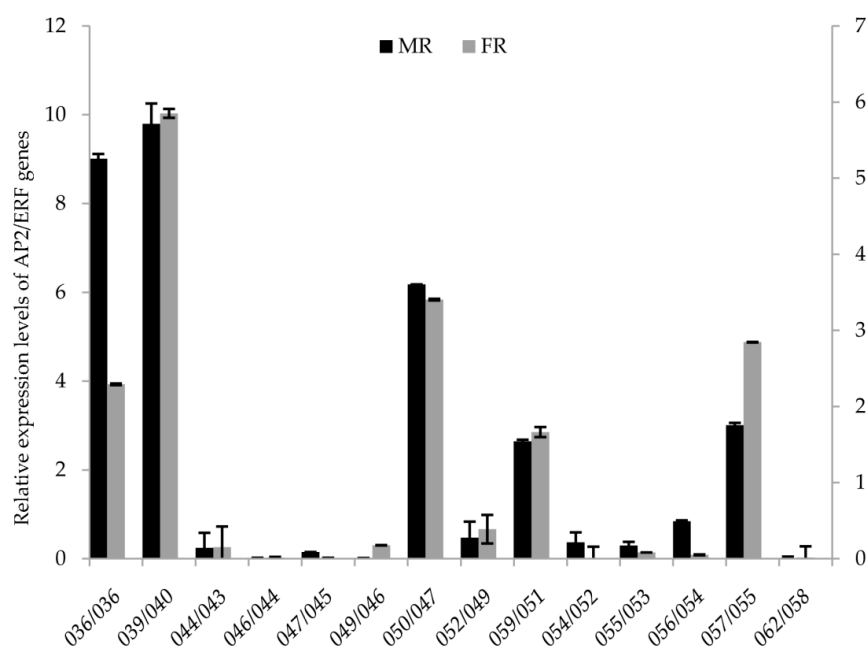

**Figure S5.** Comparative analysis of the expression levels of the selected AP2/ERF genes in root tissue. MR: root tissue in *V. montana*; FR: root tissue in *V. fordii*.



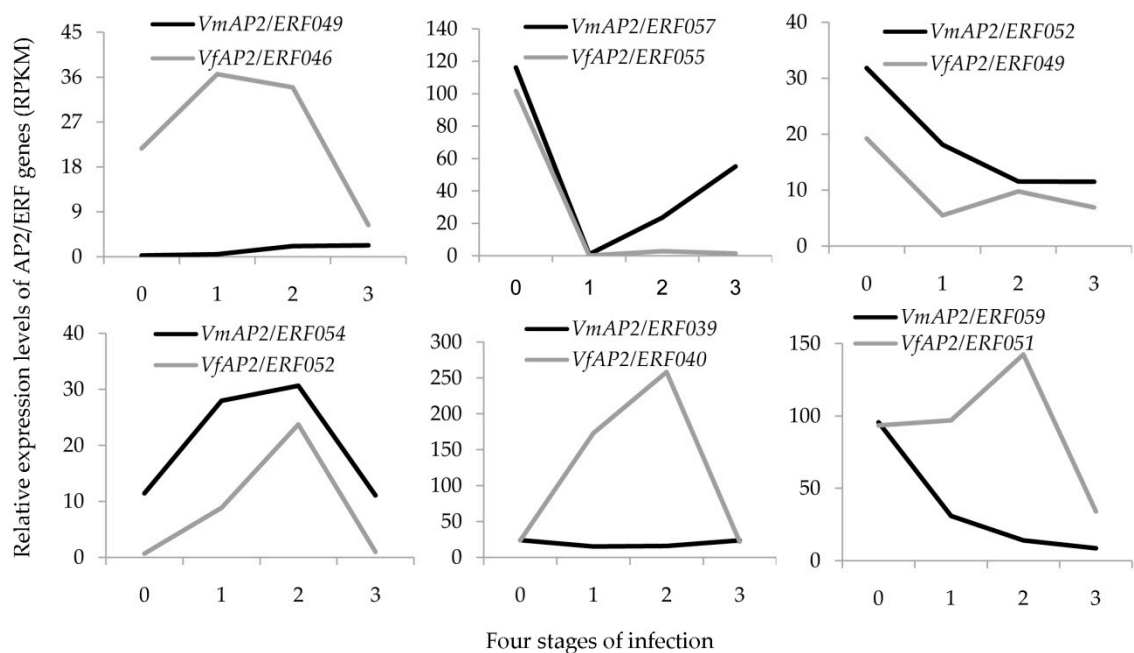

**Figure S6.** Expression trends of AP2/ERF genes for tissue specific expression analysis in *Vernicia* during the four infection stages. Axis represents averaged RPKM values from three biological experiments. The numbers in the x-axis represent stage of infection, as follows: 0, uninfected stage; 1, early stage of infection; 2, middle stage of infection; 3, late stage of infection.

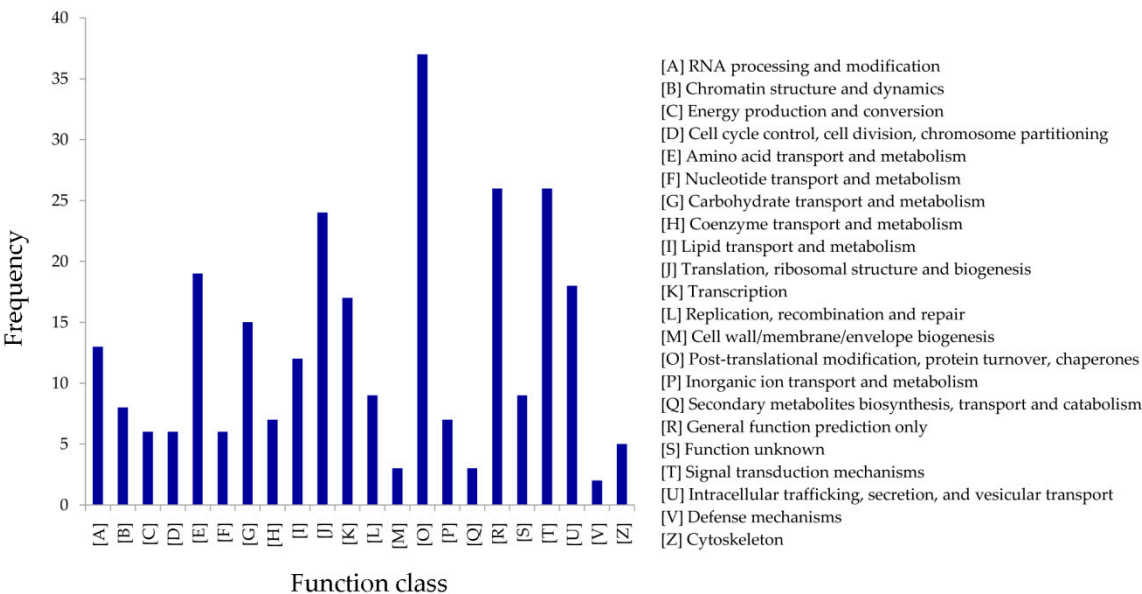

**Figure S7.** Clusters of orthologous groups (COG) classification. In total, 278 functional genes of whole annotated unigenes were grouped into 22 classifications.

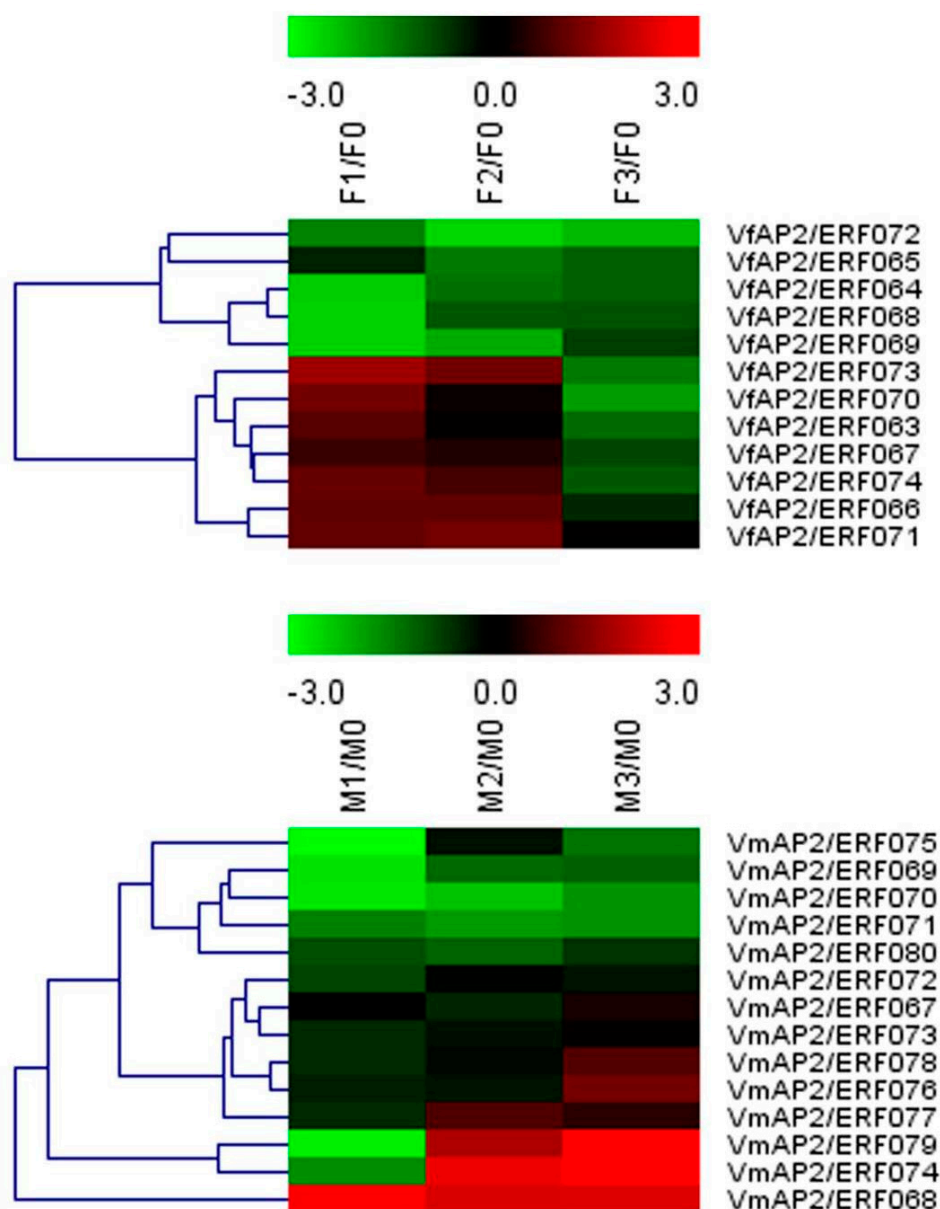

**Figure S8.** Expression profiles of AP2 genes in response to *F. oxysporum* in the root of *V. fordii* and *V. montana*. The heatmap has been generated based on the log<sub>2</sub>-transformed fold-change RPKM values and the color scale is shown at the top. **Red** represents upregulation and **green** represents downregulation.

**Table S1.** The individual APETALA2/ethylene-responsive element binding factor (AP2/ERF) genes identified in *V. fordii* and *V. montana* transcriptome database.

| Group  | Transcript_ID      | GeneticName  | Accession No. | Effective_Length | Annotation        |
|--------|--------------------|--------------|---------------|------------------|-------------------|
| Group1 | comp183962_c0_seq1 | VfAP2/ERF001 | KX868880      | 1420.00          | EREBP-like factor |
| Group1 | comp189672_c0_seq2 | VfAP2/ERF002 | KX868881      | 1823.46          | EREBP-like factor |
| Group1 | comp185524_c0_seq1 | VfAP2/ERF003 | KX868882      | 1915.00          | EREBP-like factor |
| Group1 | comp160673_c0_seq2 | VfAP2/ERF004 | KX868883      | 1150.82          | EREBP-like factor |
| Group1 | comp190709_c2_seq5 | VfAP2/ERF005 | KX868884      | 1538.54          | EREBP-like factor |
| Group1 | comp192642_c0_seq1 | VfAP2/ERF006 | KX868885      | 2520.00          | EREBP-like factor |
| Group2 | comp84118_c0_seq1  | VfAP2/ERF007 | KX868886      | 462.00           | EREBP-like factor |
| Group2 | comp149201_c0_seq1 | VfAP2/ERF008 | KX868887      | 459.00           | EREBP-like factor |
| Group2 | comp176401_c0_seq4 | VfAP2/ERF009 | KX868888      | 1411.21          | EREBP-like factor |

|          |                    |              |          |         |                   |
|----------|--------------------|--------------|----------|---------|-------------------|
| Group2   | comp160987_c0_seq1 | VfAP2/ERF010 | KX868889 | 602.00  | EREBP-like factor |
| Group2   | comp160830_c0_seq2 | VfAP2/ERF011 | KX868890 | 563.42  | EREBP-like factor |
| Group2   | comp184966_c0_seq2 | VfAP2/ERF012 | KX868891 | 1048.51 | EREBP-like factor |
| Group3   | comp159254_c1_seq1 | VfAP2/ERF013 | KX868892 | 405.00  | EREBP-like factor |
| Group3   | comp180080_c0_seq3 | VfAP2/ERF014 | KX868893 | 1570.07 | EREBP-like factor |
| Group3   | comp169343_c0_seq2 | VfAP2/ERF015 | KX868894 | 1213.62 | EREBP-like factor |
| Group3   | comp181674_c0_seq1 | VfAP2/ERF016 | KX868895 | 972.04  | EREBP-like factor |
| Group3   | comp181389_c0_seq1 | VfAP2/ERF017 | KX868896 | 1182.00 | EREBP-like factor |
| Group3   | comp173409_c0_seq1 | VfAP2/ERF018 | KX868897 | 824.84  | EREBP-like factor |
| Group3   | comp183897_c0_seq3 | VfAP2/ERF019 | KX868898 | 1046.09 | EREBP-like factor |
| Group3   | comp176265_c0_seq1 | VfAP2/ERF020 | KX868899 | 879.01  | EREBP-like factor |
| Group3   | comp164645_c0_seq1 | VfAP2/ERF021 | KX868900 | 661.00  | EREBP-like factor |
| Group3   | comp173281_c0_seq1 | VfAP2/ERF022 | KX868901 | 804.00  | EREBP-like factor |
| Group4   | comp171489_c1_seq1 | VfAP2/ERF023 | KX868902 | 714.00  | EREBP-like factor |
| Group4   | comp189934_c0_seq4 | VfAP2/ERF024 | KX868903 | 850.79  | EREBP-like factor |
| Group5   | comp148732_c0_seq1 | VfAP2/ERF025 | KX868904 | 432.00  | EREBP-like factor |
| Group5   | comp166681_c0_seq2 | VfAP2/ERF026 | KX868905 | 726.43  | EREBP-like factor |
| Group5   | comp158438_c0_seq3 | VfAP2/ERF027 | KX868906 | 1528.82 | EREBP-like factor |
| Group5   | comp149900_c0_seq1 | VfAP2/ERF028 | KX868907 | 1294.00 | EREBP-like factor |
| Group5   | comp181196_c0_seq1 | VfAP2/ERF029 | KX868908 | 1095.15 | EREBP-like factor |
| Group5   | comp188688_c0_seq1 | VfAP2/ERF030 | KX868909 | 1229.26 | EREBP-like factor |
| Group6   | comp189868_c0_seq1 | VfAP2/ERF031 | KX868910 | 1820.54 | EREBP-like factor |
| Group6   | comp186790_c1_seq1 | VfAP2/ERF032 | KX868911 | 1526.84 | EREBP-like factor |
| Group6-l | comp192264_c0_seq1 | VfAP2/ERF033 | KX868912 | 1971.00 | EREBP-like factor |
| Group6-l | comp116494_c0_seq1 | VfAP2/ERF034 | KX868913 | 864.00  | EREBP-like factor |
| Group6-l | comp183367_c0_seq5 | VfAP2/ERF035 | KX868914 | 1480.92 | EREBP-like factor |
| Group7   | comp178925_c0_seq2 | VfAP2/ERF036 | KX868915 | 747.64  | EREBP-like factor |
| Group7   | comp180742_c0_seq2 | VfAP2/ERF037 | KX868916 | 1335.90 | EREBP-like factor |
| Group7   | comp187442_c0_seq1 | VfAP2/ERF038 | KX868917 | 1701.00 | EREBP-like factor |
| Group8   | comp101758_c0_seq1 | VfAP2/ERF039 | KX868918 | 336.00  | EREBP-like factor |
| Group8   | comp179927_c0_seq1 | VfAP2/ERF040 | KX868919 | 1018.00 | EREBP-like factor |
| Group8   | comp177967_c0_seq1 | VfAP2/ERF041 | KX868920 | 742.00  | EREBP-like factor |
| Group8   | comp157807_c0_seq2 | VfAP2/ERF042 | KX868921 | 956.08  | EREBP-like factor |
| Group8   | comp160872_c0_seq1 | VfAP2/ERF043 | KX868922 | 806.00  | EREBP-like factor |
| Group9   | comp172871_c0_seq1 | VfAP2/ERF044 | KX868923 | 612.00  | EREBP-like factor |
| Group9   | comp174782_c0_seq3 | VfAP2/ERF045 | KX868924 | 864.06  | EREBP-like factor |
| Group9   | comp175038_c0_seq1 | VfAP2/ERF046 | KX868925 | 667.00  | EREBP-like factor |
| Group9   | comp189715_c1_seq1 | VfAP2/ERF047 | KX868926 | 964.00  | EREBP-like factor |
| Group9   | comp192585_c1_seq1 | VfAP2/ERF048 | KX868927 | 1237.00 | EREBP-like factor |
| Group9   | comp179276_c0_seq1 | VfAP2/ERF049 | KX868928 | 1501.09 | EREBP-like factor |
| Group9   | comp186047_c0_seq1 | VfAP2/ERF050 | KX868929 | 531.42  | EREBP-like factor |
| Group9   | comp181356_c0_seq5 | VfAP2/ERF051 | KX868930 | 792.80  | EREBP-like factor |
| Group9   | comp171620_c0_seq1 | VfAP2/ERF052 | KX868931 | 825.00  | EREBP-like factor |
| Group9   | comp181105_c0_seq2 | VfAP2/ERF053 | KX868932 | 843.07  | EREBP-like factor |
| Group9   | comp136851_c0_seq1 | VfAP2/ERF054 | KX868933 | 768.00  | EREBP-like factor |
| Group9   | comp178204_c0_seq1 | VfAP2/ERF055 | KX868934 | 952.00  | EREBP-like factor |

|          |                     |              |          |         |                                |
|----------|---------------------|--------------|----------|---------|--------------------------------|
| Group10  | comp174721_c0_seq1  | VfAP2/ERF056 | KX868935 | 1173.00 | EREBP-like factor              |
| Group10  | comp184569_c0_seq5  | VfAP2/ERF057 | KX868936 | 1684.12 | EREBP-like factor              |
| Group10  | comp181627_c0_seq2  | VfAP2/ERF058 | KX868937 | 1352.93 | EREBP-like factor              |
| Group10  | comp181660_c0_seq2  | VfAP2/ERF059 | KX868938 | 1323.16 | EREBP-like factor              |
| Group10  | comp194219_c2_seq5  | VfAP2/ERF060 | KX868939 | 1147.02 | EREBP-like factor              |
| RAV      | comp189189_c0_seq2  | VfAP2/ERF061 | KX868940 | 1061.98 | RAV-like factor                |
| RAV      | comp176028_c0_seq1  | VfAP2/ERF062 | KX868941 | 1300.00 | RAV-like factor                |
| AP2      | comp192732_c0_seq6  | VfAP2/ERF063 | KX868942 | 796.07  | AP2-like factor, euAP2 lineage |
| AP2      | comp191512_c0_seq2  | VfAP2/ERF064 | KX868943 | 1193.76 | AP2-like factor, euAP2 lineage |
| AP2      | comp195632_c1_seq20 | VfAP2/ERF065 | KX868944 | 1373.64 | AP2-like factor, euAP2 lineage |
| AP2      | comp191268_c0_seq4  | VfAP2/ERF066 | KX868945 | 1482.02 | AP2-like factor, euAP2 lineage |
| AP2      | comp184116_c0_seq1  | VfAP2/ERF067 | KX868946 | 1035.46 | AP2-like factor, euAP2 lineage |
| AP2      | comp186054_c0_seq1  | VfAP2/ERF068 | KX868947 | 1949.28 | AP2-like factor, euAP2 lineage |
| AP2      | comp179411_c0_seq1  | VfAP2/ERF069 | KX868948 | 1795.38 | AP2-like factor, ANT lineage   |
| AP2      | comp178775_c0_seq3  | VfAP2/ERF070 | KX868949 | 1188.85 | AP2-like factor, ANT lineage   |
| AP2      | comp191827_c0_seq1  | VfAP2/ERF071 | KX868950 | 2271.00 | AP2-like factor, ANT lineage   |
| AP2      | comp184446_c1_seq1  | VfAP2/ERF072 | KX868951 | 1584.00 | AP2-like factor, ANT lineage   |
| AP2      | comp184446_c0_seq1  | VfAP2/ERF073 | KX868952 | 732.00  | AP2-like factor, ANT lineage   |
| AP2      | comp184881_c0_seq5  | VfAP2/ERF074 | KX868953 | 1055.28 | AP2-like factor, ANT lineage   |
| solosist | comp191237_c1_seq13 | VfAP2/ERF075 | KX868954 | 1272.47 | -                              |
| Group1   | comp138429_c0_seq4  | VmAP2/ERF001 | KX868799 | 1510.61 | EREBP-like factor              |
| Group1   | comp164853_c0_seq3  | VmAP2/ERF002 | KX868800 | 2120.15 | EREBP-like factor              |
| Group1   | comp137524_c0_seq1  | VmAP2/ERF003 | KX868801 | 2219.00 | EREBP-like factor              |
| Group1   | comp64502_c0_seq1   | VmAP2/ERF004 | KX868802 | 1676.00 | EREBP-like factor              |
| Group1   | comp164758_c0_seq1  | VmAP2/ERF005 | KX868803 | 1245    | EREBP-like factor              |
| Group2   | comp116109_c0_seq1  | VmAP2/ERF006 | KX868804 | 1132.00 | EREBP-like factor              |
| Group2   | comp157844_c0_seq1  | VmAP2/ERF007 | KX868805 | 1068.00 | EREBP-like factor              |
| Group2   | comp128472_c0_seq1  | VmAP2/ERF008 | KX868806 | 580.33  | EREBP-like factor              |
| Group2   | comp129700_c0_seq1  | VmAP2/ERF009 | KX868807 | 418.00  | EREBP-like factor              |
| Group2   | comp186932_c0_seq1  | VmAP2/ERF010 | KX868808 | 466.00  | EREBP-like factor              |
| Group3   | comp251319_c0_seq1  | VmAP2/ERF011 | KX868809 | 431.00  | EREBP-like factor              |
| Group3   | comp124868_c0_seq1  | VmAP2/ERF012 | KX868810 | 1177.00 | EREBP-like factor              |
| Group3   | comp128319_c0_seq1  | VmAP2/ERF013 | KX868811 | 774.65  | EREBP-like factor              |
| Group3   | comp143146_c0_seq1  | VmAP2/ERF014 | KX868812 | 1004    | EREBP-like factor              |
| Group3   | comp138574_c0_seq4  | VmAP2/ERF015 | KX868813 | 1122.79 | EREBP-like factor              |
| Group3   | comp129405_c0_seq1  | VmAP2/ERF016 | KX868814 | 1216.00 | EREBP-like factor              |
| Group3   | comp85604_c0_seq1   | VmAP2/ERF017 | KX868815 | 548.00  | EREBP-like factor              |
| Group3   | comp107282_c0_seq1  | VmAP2/ERF018 | KX868816 | 728.14  | EREBP-like factor              |
| Group3   | comp143204_c0_seq1  | VmAP2/ERF019 | KX868817 | 917.00  | EREBP-like factor              |
| Group3   | comp127938_c0_seq1  | VmAP2/ERF020 | KX868818 | 1056.00 | EREBP-like factor              |
| Group3   | comp145334_c1_seq1  | VmAP2/ERF021 | KX868819 | 928.31  | EREBP-like factor              |



|          |                    |              |          |         |                   |
|----------|--------------------|--------------|----------|---------|-------------------|
| Group3   | comp151923_c1_seq1 | VmAP2/ERF022 | KX868820 | 545.50  | EREBP-like factor |
| Group3   | comp208000_c0_seq1 | VmAP2/ERF023 | KX868821 | 882.00  | EREBP-like factor |
| Group4   | comp397454_c0_seq1 | VmAP2/ERF024 | KX868822 | 706.00  | EREBP-like factor |
| Group4   | comp144341_c0_seq1 | VmAP2/ERF025 | KX868823 | 1078.00 | EREBP-like factor |
| Group5   | comp63102_c0_seq1  | VmAP2/ERF026 | KX868824 | 506.00  | EREBP-like factor |
| Group5   | comp110005_c0_seq1 | VmAP2/ERF027 | KX868825 | 1074.00 | EREBP-like factor |
| Group5   | comp150298_c0_seq3 | VmAP2/ERF028 | KX868826 | 795.88  | EREBP-like factor |
| Group5   | comp157176_c0_seq1 | VmAP2/ERF029 | KX868827 | 1026.69 | EREBP-like factor |
| Group6   | comp129421_c0_seq1 | VmAP2/ERF030 | KX868828 | 1099.00 | EREBP-like factor |
| Group6   | comp137242_c0_seq2 | VmAP2/ERF031 | KX868829 | 1513.65 | EREBP-like factor |
| Group6   | comp137462_c0_seq3 | VmAP2/ERF032 | KX868830 | 1707.28 | EREBP-like factor |
| Group6   | comp161719_c1_seq4 | VmAP2/ERF033 | KX868831 | 867.29  | EREBP-like factor |
| Group6-1 | comp160313_c0_seq1 | VmAP2/ERF034 | KX868832 | 1412.00 | EREBP-like factor |
| Group6-1 | comp162707_c0_seq1 | VmAP2/ERF035 | KX868833 | 2013.00 | EREBP-like factor |
| Group7   | comp139704_c0_seq1 | VmAP2/ERF036 | KX868834 | 2079.00 | EREBP-like factor |
| Group7   | comp151256_c0_seq3 | VmAP2/ERF037 | KX868835 | 997.94  | EREBP-like factor |
| Group7   | comp162529_c0_seq1 | VmAP2/ERF038 | KX868836 | 1536.01 | EREBP-like factor |
| Group8   | comp146876_c0_seq1 | VmAP2/ERF039 | KX868837 | 1089.00 | EREBP-like factor |
| Group8   | comp149810_c0_seq1 | VmAP2/ERF040 | KX868838 | 1518.34 | EREBP-like factor |
| Group8   | comp128719_c0_seq1 | VmAP2/ERF041 | KX868839 | 1098.00 | EREBP-like factor |
| Group8   | comp140154_c0_seq1 | VmAP2/ERF042 | KX868840 | 1365.00 | EREBP-like factor |
| Group8   | comp141925_c0_seq1 | VmAP2/ERF043 | KX868841 | 341.75  | EREBP-like factor |
| Group8   | comp173049_c0_seq1 | VmAP2/ERF044 | KX868842 | 795.00  | EREBP-like factor |
| Group9   | comp227613_c0_seq1 | VmAP2/ERF045 | KX868843 | 420.00  | EREBP-like factor |
| Group9   | comp139267_c0_seq1 | VmAP2/ERF046 | KX868844 | 870.00  | EREBP-like factor |
| Group9   | comp144276_c0_seq3 | VmAP2/ERF047 | KX868845 | 1155.52 | EREBP-like factor |
| Group9   | comp109538_c0_seq1 | VmAP2/ERF048 | KX868846 | 650.00  | EREBP-like factor |
| Group9   | comp163543_c0_seq2 | VmAP2/ERF049 | KX868847 | 1056.75 | EREBP-like factor |
| Group9   | comp141156_c0_seq3 | VmAP2/ERF050 | KX868848 | 1144.45 | EREBP-like factor |
| Group9   | comp155356_c1_seq1 | VmAP2/ERF051 | KX868849 | 1230.00 | EREBP-like factor |
| Group9   | comp145295_c0_seq1 | VmAP2/ERF052 | KX868850 | 1078.00 | EREBP-like factor |
| Group9   | comp149797_c0_seq1 | VmAP2/ERF053 | KX868851 | 1037.00 | EREBP-like factor |
| Group9   | comp129078_c0_seq3 | VmAP2/ERF054 | KX868852 | 1034.51 | EREBP-like factor |
| Group9   | comp137888_c0_seq1 | VmAP2/ERF055 | KX868853 | 919.00  | EREBP-like factor |
| Group9   | comp79448_c0_seq1  | VmAP2/ERF056 | KX868854 | 766.00  | EREBP-like factor |
| Group9   | comp149261_c0_seq1 | VmAP2/ERF057 | KX868855 | 845.31  | EREBP-like factor |
| Group9   | comp156406_c1_seq2 | VmAP2/ERF058 | KX868856 | 379.16  | EREBP-like factor |
| Group9   | comp128686_c0_seq1 | VmAP2/ERF059 | KX868857 | 1229.00 | EREBP-like factor |
| Group10  | comp122372_c0_seq1 | VmAP2/ERF060 | KX868858 | 1976.49 | EREBP-like factor |
| Group10  | comp154312_c0_seq2 | VmAP2/ERF061 | KX868859 | 1766.91 | EREBP-like factor |
| Group10  | comp154195_c0_seq1 | VmAP2/ERF062 | KX868860 | 1201.03 | EREBP-like factor |
| Group10  | comp143779_c0_seq1 | VmAP2/ERF063 | KX868861 | 795.00  | EREBP-like factor |
| Group10  | comp162260_c0_seq3 | VmAP2/ERF064 | KX868862 | 720.48  | EREBP-like factor |
| RAV      | comp159597_c0_seq2 | VmAP2/ERF065 | KX868863 | 1253.54 | RAV-like factor   |
| RAV      | comp169832_c0_seq1 | VmAP2/ERF066 | KX868864 | 1305.00 | RAV-like factor   |

|          |                     |                     |          |         |                                |
|----------|---------------------|---------------------|----------|---------|--------------------------------|
| AP2      | comp159240_c0_seq11 | <i>VmAP2/ERF067</i> | KX868865 | 1080.48 | AP2-like factor, ANT lineage   |
| AP2      | comp165608_c0_seq13 | <i>VmAP2/ERF068</i> | KX868866 | 2246.56 | AP2-like factor, ANT lineage   |
| AP2      | comp166307_c0_seq9  | <i>VmAP2/ERF069</i> | KX868867 | 1326.76 | AP2-like factor, euAP2 lineage |
| AP2      | comp166849_c0_seq3  | <i>VmAP2/ERF070</i> | KX868868 | 1041.65 | AP2-like factor, euAP2 lineage |
| AP2      | comp165181_c0_seq84 | <i>VmAP2/ERF071</i> | KX868869 | 2623.48 | AP2-like factor, euAP2 lineage |
| AP2      | comp156517_c1_seq1  | <i>VmAP2/ERF072</i> | KX868870 | 1899.00 | AP2-like factor, euAP2 lineage |
| AP2      | comp165500_c1_seq5  | <i>VmAP2/ERF073</i> | KX868871 | 1306.33 | AP2-like factor, euAP2 lineage |
| AP2      | comp105036_c0_seq1  | <i>VmAP2/ERF074</i> | KX868872 | 942.00  | AP2-like factor, ANT lineage   |
| AP2      | comp86450_c0_seq1   | <i>VmAP2/ERF075</i> | KX868873 | 561.00  | AP2-like factor, ANT lineage   |
| AP2      | comp293964_c0_seq1  | <i>VmAP2/ERF076</i> | KX868874 | 1269.00 | AP2-like factor, ANT lineage   |
| AP2      | comp111892_c0_seq2  | <i>VmAP2/ERF077</i> | KX868875 | 1085.13 | AP2-like factor, ANT lineage   |
| AP2      | comp149426_c0_seq2  | <i>VmAP2/ERF078</i> | KX868876 | 1275.65 | AP2-like factor, ANT lineage   |
| AP2      | comp104878_c0_seq1  | <i>VmAP2/ERF079</i> | KX868877 | 1493.00 | AP2-like factor, ANT lineage   |
| AP2      | comp155189_c0_seq1  | <i>VmAP2/ERF080</i> | KX868878 | 1066.98 | AP2-like factor, euAP2 lineage |
| solosist | comp167675_c0_seq10 | <i>VmAP2/ERF081</i> | KX868879 | 1694.73 | -                              |

**Table S2.** Conserved motifs identified from the ERF family in *V. fordii* and *V. montana*.

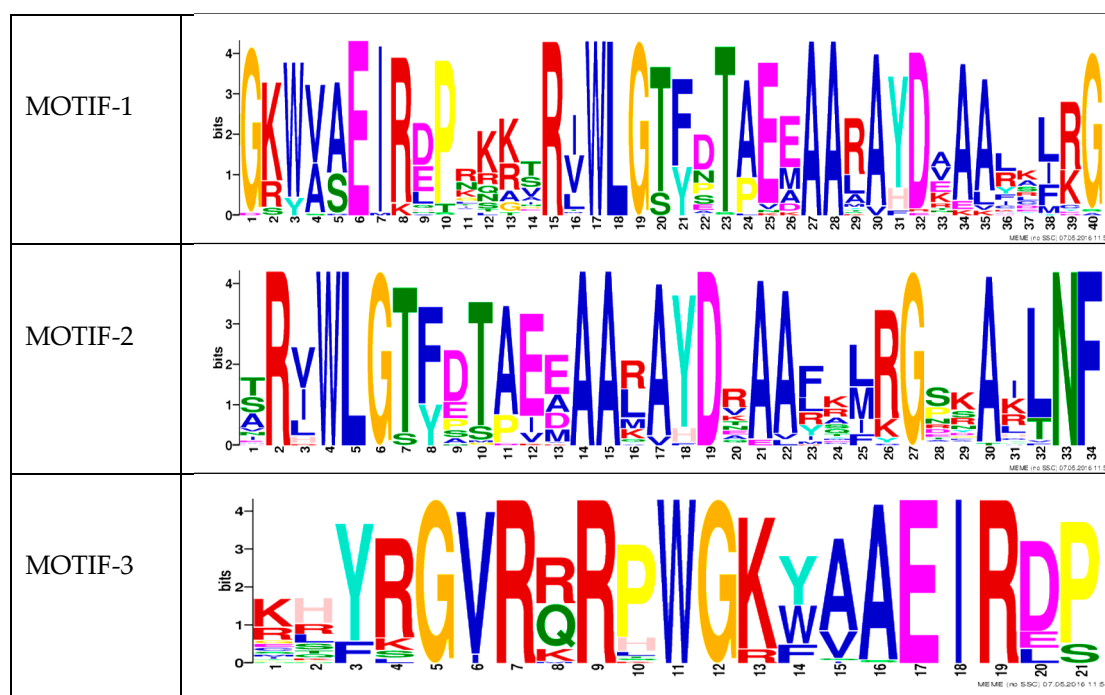

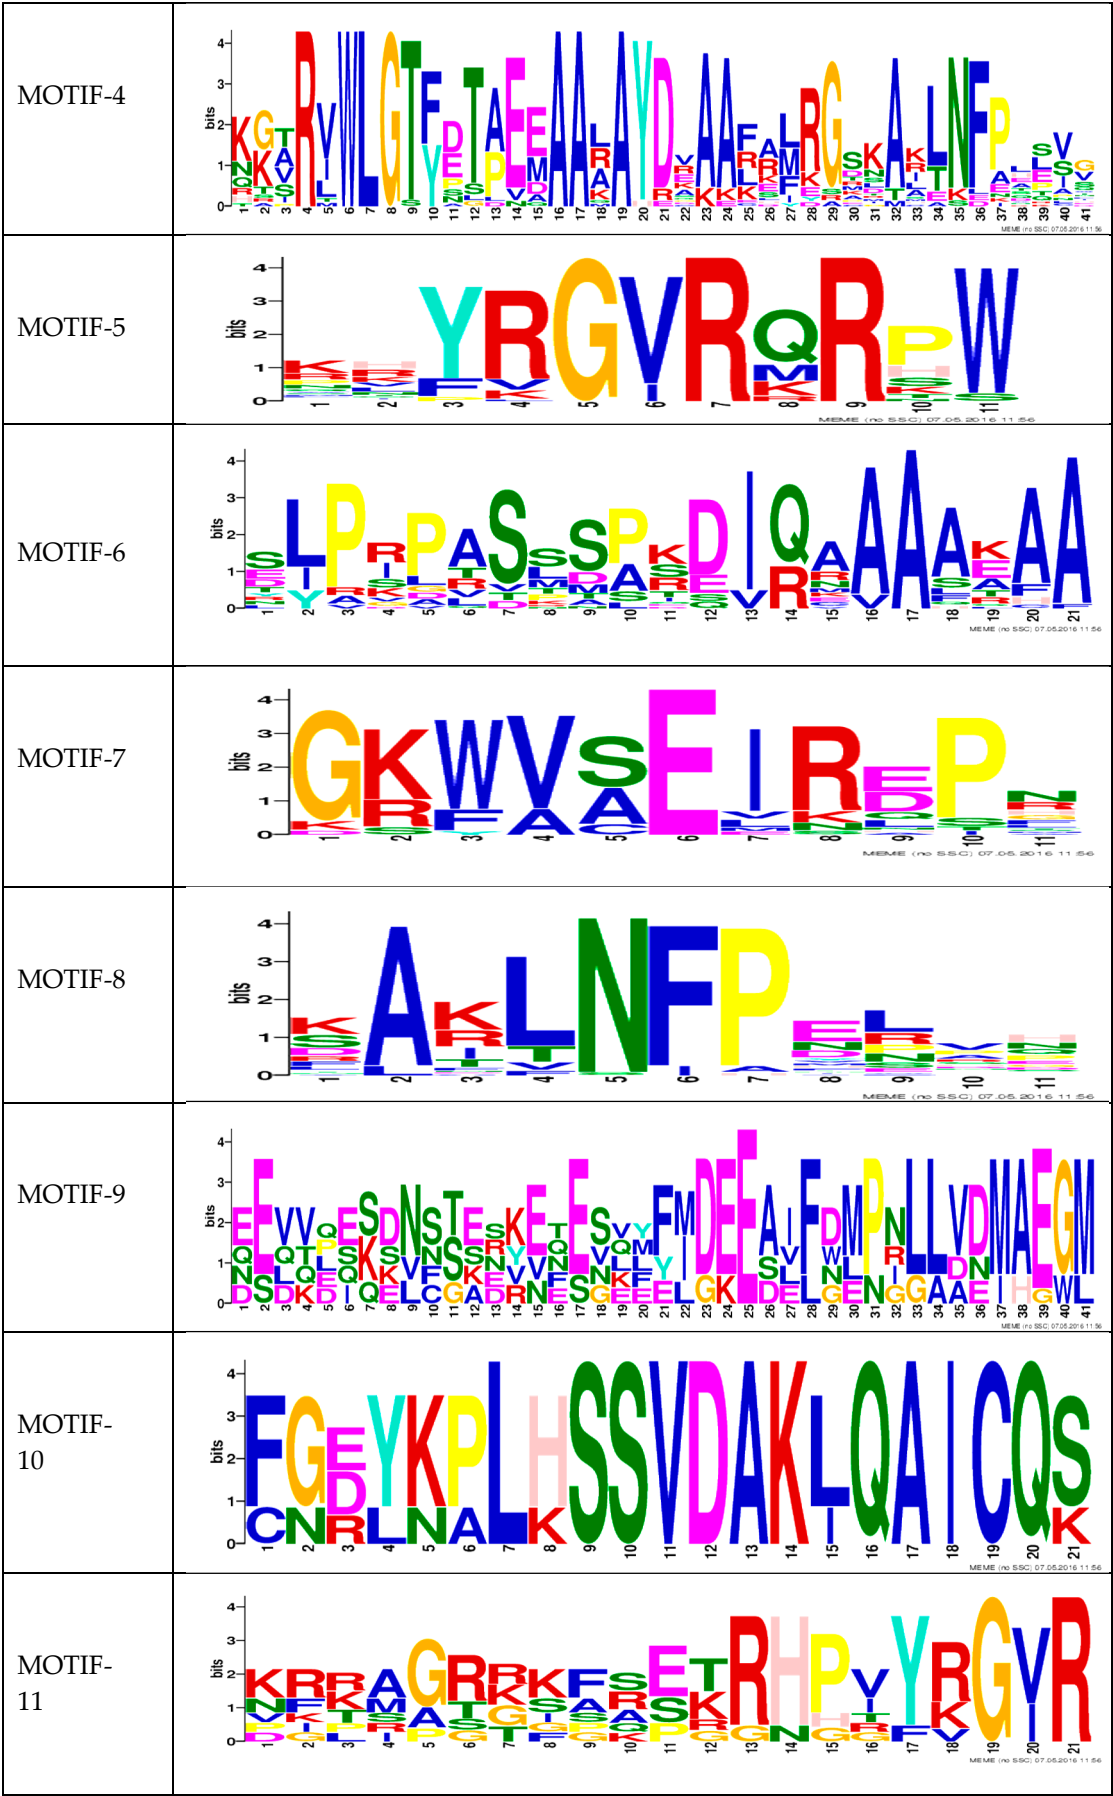

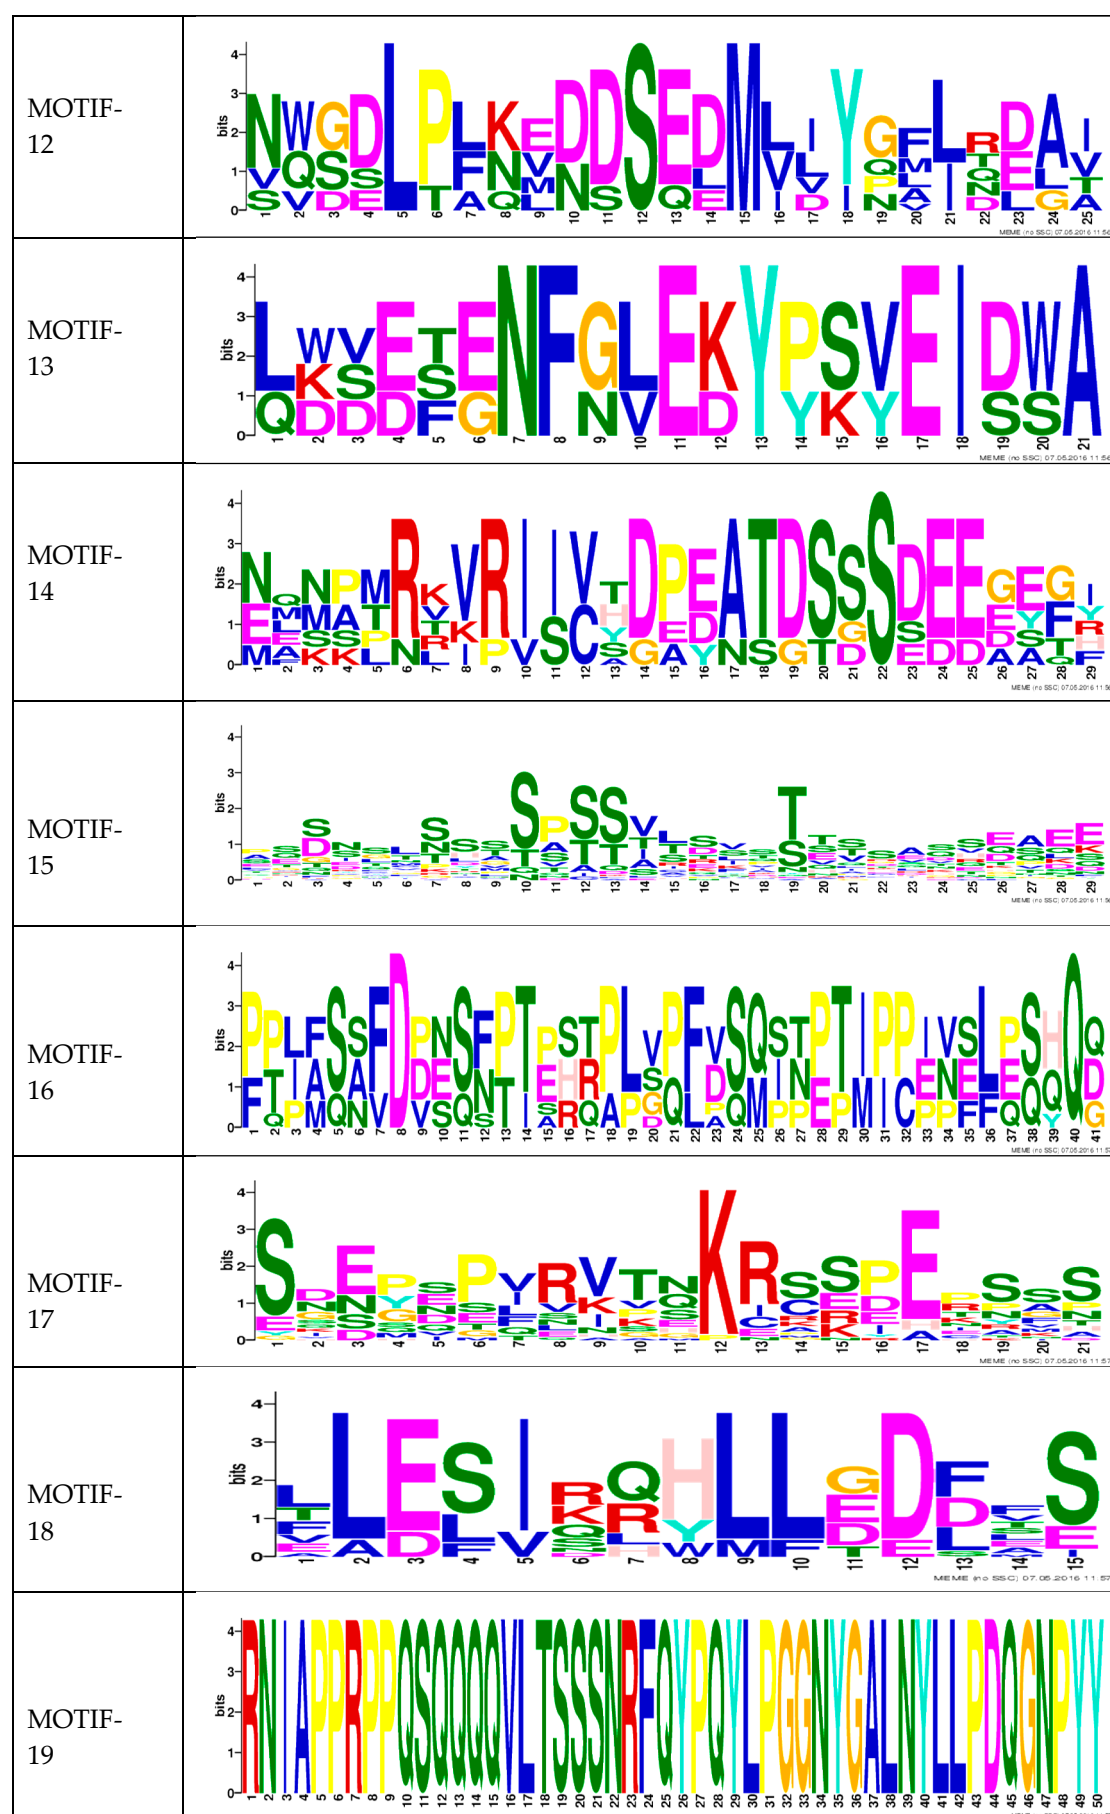



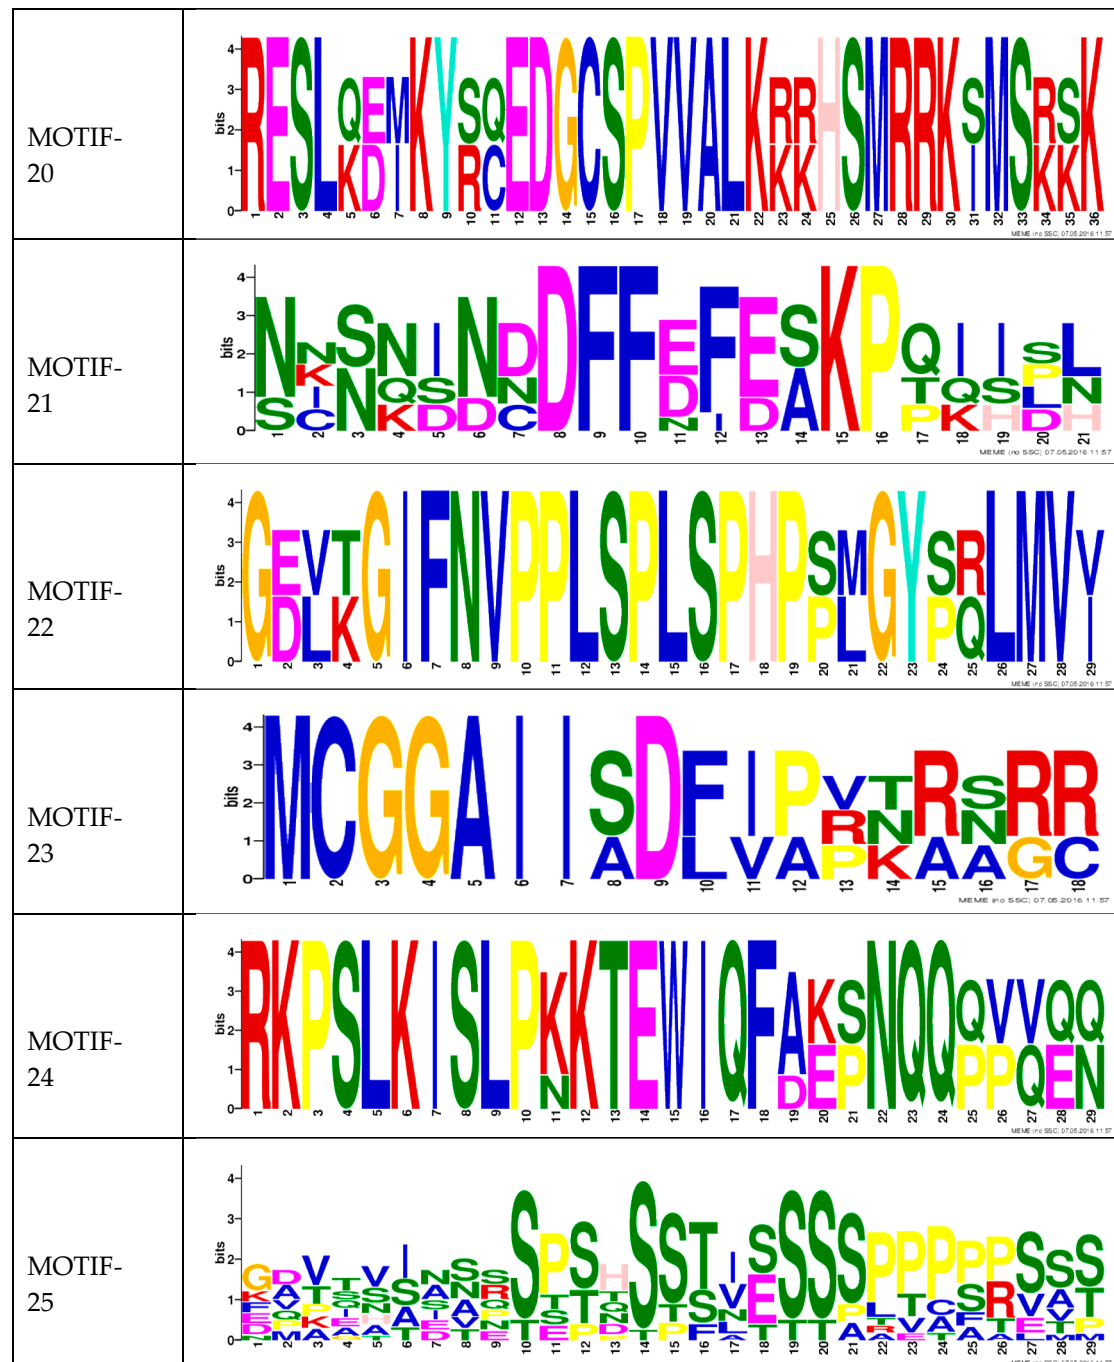

**Table S3.** The one to one orthologous gene pairs and their corresponding Ka/Ks ratios.

| Vf-Transcript-ID   | Vm-Transcript-ID | Ka         | Ks         | Ka/Ks     | pValue                    |
|--------------------|------------------|------------|------------|-----------|---------------------------|
| comp181389_c0_seq1 | comp129405_c0    | 0          | 0.00612149 | 0         | 0                         |
| comp189934_c0_seq4 | comp144341_c0    | 0          | 0.0125965  | 0         | 0                         |
| comp189868_c0_seq1 | comp137462_c0    | 0          | 0.00433721 | 0         | 0                         |
| comp187442_c0_seq1 | comp162529_c0    | 0          | 0.0169105  | 0         | 0                         |
| comp186047_c0_seq1 | comp149797_c0    | 0          | 0.00631718 | 0         | 0                         |
| comp189189_c0_seq2 | comp159597_c0    | 0          | 0.00514015 | 0         | 0                         |
| comp192732_c0_seq6 | comp166849_c0    | 0          | 0.00535543 | 0         | 0                         |
| comp191512_c0_seq2 | comp166307_c0    | 0          | 0.0192735  | 0         | 0                         |
| comp179411_c0_seq1 | comp149426_c0    | 0.00169139 | 0.101434   | 0.0166748 | $5.50004 \times 10^{-19}$ |
| comp191827_c0_seq1 | comp165608_c0    | 0.0017379  | 0.0323087  | 0.0537903 | $4.51682 \times 10^{-6}$  |
| comp184446_c0_seq1 | comp104878_c0    | 0.00208492 | 0.0364062  | 0.0572683 | 0.00264178                |
| comp174782_c0_seq3 | comp144276_c0    | 0.00201057 | 0.0215903  | 0.0931237 | 0.0330677                 |

|                     |               |            |            |             |            |
|---------------------|---------------|------------|------------|-------------|------------|
| comp192264_c0_seq1  | comp162707_c0 | 0.0059197  | 0.0300008  | 0.197318    | 0.00640571 |
| comp194219_c2_seq5  | comp162260_c0 | 0.0142319  | 0.0661226  | 0.215235    | 0.0504604  |
| comp176401_c0_seq4  | comp116109_c0 | 0.00276959 | 0.00946959 | 0.292472    | 0.351771   |
| comp191237_c1_seq13 | comp167675_c0 | 0.00186162 | 0.00634927 | 0.293202    | 0.35172    |
| comp178204_c0_seq1  | comp149261_c0 | 0.0046603  | 0.0158211  | 0.294562325 | 0.0888517  |
| comp180742_c0_seq2  | comp151256_c0 | 0.00668351 | 0.0188792  | 0.354015    | 0.116641   |
| comp195632_c1_seq20 | comp165181_c0 | 0.00339996 | 0.0087504  | 0.388549    | 0.195599   |
| comp184881_c0_seq5  | comp159240_c0 | 0.006005   | 0.013469   | 0.445838592 | 0          |
| comp169343_c0_seq2  | comp128319_c0 | 0.00601339 | 0.0129221  | 0.465355    | 0.340267   |
| comp175038_c0_seq1  | comp163543_c0 | 0.0251589  | 0.0467847  | 0.53776     | 0.30829    |
| comp179927_c0_seq1  | comp146876_c0 | 1.66988    | 2.90621    | 0.574591    | 0.127146   |
| comp184116_c0_seq1  | comp165500_c1 | 0.00186881 | 0.00315658 | 0.592036    | 0.529337   |
| comp173281_c0_seq1  | comp143204_c0 | 0.0490596  | 0.0818801  | 0.599164    | 0.292438   |
| comp181356_c0_seq5  | comp128686_c0 | 0.00421772 | 0.0059239  | 0.711983    | 0.582043   |
| comp181196_c0_seq1  | comp150298_c0 | 0.0176049  | 0.0244858  | 0.718984064 | 0.0337182  |
| comp171489_c1_seq1  | comp397454_c0 | 0.0111181  | 0.0132456  | 0.839379    | 0.391042   |
| comp186790_c1_seq1  | comp137242_c0 | 0.116244   | 0.121525   | 0.956542    | 0.818689   |
| comp171620_c0_seq1  | comp129078_c0 | 0.0103302  | 0.0103997  | 0.993317115 | 0.564387   |
| comp181674_c0_seq1  | comp138574_c0 | 2.21627    | 2.20093    | 1.00697     | 1          |
| comp181660_c0_seq2  | comp154195_c0 | 1.34183    | 1.2143     | 1.10502     | 0.536572   |
| comp184569_c0_seq5  | comp154312_c0 | 0.746161   | 0.624663   | 1.1945      | 0.12609    |
| comp160673_c0_seq2  | comp64502_c0  | 2.02707    | 1.67002    | 1.2138      | 0.485206   |
| comp183962_c0_seq1  | comp138429_c0 | 1.27227    | 0.949497   | 1.33994     | 0.29544    |
| comp181105_c0_seq2  | comp137888_c0 | 0.0880494  | 0.0573395  | 1.53558     | 0.32824    |
| comp178925_c0_seq2  | comp139704_c0 | 2.52379    | 1.60025    | 1.57713     | 0.10624    |
| comp184966_c0_seq2  | comp157844_c0 | 0          | 0          | NA          | 0          |
| comp180080_c0_seq3  | comp124868_c0 | 0          | 0          | NA          | 0          |
| comp183897_c0_seq3  | comp127938_c0 | 0          | 0          | NA          | 0          |
| comp176265_c0_seq1  | comp145334_c1 | 0          | 0          | NA          | 0          |
| comp158438_c0_seq3  | comp110005_c0 | 0          | 0          | NA          | 0          |
| comp188688_c0_seq1  | comp157176_c0 | 0          | 0          | NA          | 0          |
| comp183367_c0_seq5  | comp160313_c0 | 0          | 0          | NA          | 0          |
| comp160872_c0_seq1  | comp173049_c0 | 0          | 0          | NA          | 0          |
| comp172871_c0_seq1  | comp139267_c0 | 0          | 0          | NA          | 0          |
| comp189715_c1_seq1  | comp141156_c0 | 0          | 0          | NA          | 0          |
| comp192585_c1_seq1  | comp155356_c1 | 0          | 0          | NA          | 0          |
| comp179276_c0_seq1  | comp145295_c0 | 0          | 0          | NA          | 0          |
| comp129744_c0_seq1  | comp79448_c0  | 0          | 0          | NA          | 0          |
| comp174721_c0_seq1  | comp122372_c0 | 0          | 0          | NA          | 0          |
| comp186054_c0_seq1  | comp156517_c1 | 0          | 0          | NA          | 0          |

**Table S4.** List of specific primer sequences used for real-time PCR analysis.

| GeneticName            | Primer (5'-3')          | Length |
|------------------------|-------------------------|--------|
| <i>VfAP2/ERF012-F1</i> | ACCGTGTCTTCAGTAGTTTCG   | 22     |
| <i>VfAP2/ERF012-R1</i> | GGTCCTGTTAATGGTGCAAAAA  | 22     |
| <i>VfAP2/ERF022-F1</i> | GTTTCAACTCCTCTTCATCTC   | 21     |
| <i>VfAP2/ERF022-R1</i> | GATGTTTTTTCTAATGGGTCT   | 21     |
| <i>VfAP2/ERF043-F1</i> | CTGTTTGTTTCTTTCATGGCGT  | 22     |
| <i>VfAP2/ERF043-R1</i> | AGCTTCTTCTGGTGTGTCGAATG | 23     |
| <i>VfAP2/ERF054-F1</i> | TTCACCAGTAACTGGTTGCCAA  | 22     |
| <i>VfAP2/ERF054-R1</i> | CCGATGATTATGTGCCGATTAG  | 22     |
| <i>VfAP2/ERF031-F1</i> | TGATACCGATGCTATTTGG     | 19     |
| <i>VfAP2/ERF031-R1</i> | CTGCTGCTGTTGTACGTTT     | 19     |
| <i>VfAP2/ERF027-F1</i> | GTCTAATAATGAACCAGCGGCA  | 22     |
| <i>VfAP2/ERF027-R1</i> | CAACTCTACTACTGAGCACGGAT | 23     |
| <i>VfAP2/ERF047-F1</i> | GGACCTTCGACACAGCTATCGA  | 22     |

|                 |                           |    |
|-----------------|---------------------------|----|
| VfAP2/ERF047-R1 | GGTGCGTGTATTCAACTTCCCA    | 22 |
| VfAP2/ERF058-F1 | CTCAGCCCTAGCTCAAGTCATT    | 22 |
| VfAP2/ERF058-R1 | GTGCGTTTGATTGTGGTGGTAT    | 22 |
| VfAP2/ERF044-F1 | CTGCTGCTTTTTTCTTGCTC      | 21 |
| VfAP2/ERF044-R1 | TTCCGGTGGAAATTGTTAG       | 19 |
| VfAP2/ERF036-F1 | TCTCTCTTGCAAACATGTGTGGT   | 23 |
| VfAP2/ERF036-R1 | GGTAGGGATTGATCTTTATTGCC   | 23 |
| VfAP2/ERF040-F1 | GCCGCCGAAATAAGAGATCC      | 20 |
| VfAP2/ERF040-R1 | GCTTTAGCGCCACGAAAGTC      | 20 |
| VfAP2/ERF045-F1 | GTCAAGAAGATGGTTGCTCAC     | 21 |
| VfAP2/ERF045-R1 | GTTGTTCCAAATAATCAGGG      | 20 |
| VfAP2/ERF046-F1 | AGGTAGTGAAATCTTCAAGGATGG  | 24 |
| VfAP2/ERF046-R1 | TGAAGCTAAACCTCCAAAATCACTC | 25 |
| VfAP2/ERF049-F1 | TGGAGGCTGGACTGGCTGAT      | 20 |
| VfAP2/ERF049-R1 | AGGGTTTCCTGATAACGGTG      | 20 |
| VfAP2/ERF051-F1 | TTCTTCTTCATCTTTGTCGG      | 20 |
| VfAP2/ERF051-R1 | CATTTTCGCATTTCTAACCC      | 19 |
| VfAP2/ERF052-F1 | CATTTTCCTCTCACTTTCCTTC    | 22 |
| VfAP2/ERF052-R1 | CCATGTCTTGAGTCATTCTCAT    | 24 |
| VfAP2/ERF053-F1 | ATGATCGTGTACGGTGCTCTTC    | 22 |
| VfAP2/ERF053-R1 | GCGTTACTCTCACTTGCTGCTG    | 22 |
| VfAP2/ERF055-F1 | AACGGTATCTTCTTGAAGACG     | 21 |
| VfAP2/ERF055-R1 | TCAAACCTGAACCTAACGGAGTC   | 21 |
| VmAP2/ERF007-F1 | ACCCGATATTAACATTTTCGG     | 21 |
| VmAP2/ERF007-R1 | AGTCTTGATTTTGGGGAGGA      | 20 |
| VmAP2/ERF019-F1 | ACCATCTTTGCCTACAACCGCC    | 22 |
| VmAP2/ERF019-R1 | CATTTGCCCCAACTTCTCATCC    | 22 |
| VmAP2/ERF044-F1 | CTGTTTGTTTCTTTCATGGCGT    | 22 |
| VmAP2/ERF044-R1 | AGCTTCTTCTGGTGTGTGCAATG   | 23 |
| VmAP2/ERF056-F1 | TTCACCAGTAACCTGGTTGCCAA   | 22 |
| VmAP2/ERF056-R1 | CCGATGATTATGTGCCGATTAG    | 22 |
| VmAP2/ERF032-F1 | CAATACCAGAGGCAAAACCACT    | 22 |
| VmAP2/ERF032-R1 | GATGACCTGCTTCTCCAAATAG    | 22 |
| VmAP2/ERF027-F1 | GACTTCCTTCTTCCTCGCAAACC   | 23 |
| VmAP2/ERF027-R1 | AAACAACCACACCCTTGACGCT    | 22 |
| VmAP2/ERF050-F1 | GATTGTAGAGGAGCAAGCGAA     | 21 |
| VmAP2/ERF050-R1 | TGGATGAGGAGATAACGGAGAC    | 22 |
| VmAP2/ERF062-F1 | CACACAAAGACAGATCGACGTAA   | 23 |
| VmAP2/ERF062-R1 | GGCTGAAAAAAGAGGGGAGAAT    | 22 |
| VmAP2/ERF046-F1 | CTGCTGCTTTTTTCTTGCTC      | 21 |
| VmAP2/ERF046-R1 | TTCCGGTGGAAATTGTTAG       | 19 |
| VmAP2/ERF036-F1 | GGGAAATGGGCTGCTGAGAT      | 20 |
| VmAP2/ERF036-R1 | ACTGCTGGTGGTTGTTGTGA      | 20 |
| VmAP2/ERF039-F1 | AAACCATCACCACACAACCACC    | 22 |
| VmAP2/ERF039-R1 | CTTTCGGAGCCATTTTCGCA      | 19 |
| VmAP2/ERF047-F1 | CAACAAGGCATGGAATTAGA      | 20 |
| VmAP2/ERF047-R1 | TTAGAGCAACAACAGGTGAGC     | 21 |
| VmAP2/ERF049-F1 | CTTCCTTGCTCTTCCTATTTC     | 22 |
| VmAP2/ERF049-R1 | GATGATGAACAAGCTACAGGTGA   | 23 |
| VmAP2/ERF052-F1 | TGGAGGCTGGACTGGCTGAT      | 20 |
| VmAP2/ERF052-R1 | AGGGTTTCCTGATAACGGTG      | 20 |
| VmAP2/ERF059-F1 | CCCGAAGTACAGCTGCCAGAGA    | 22 |

|                        |                          |    |
|------------------------|--------------------------|----|
| <i>VmAP2/ERF059-R1</i> | CTAACCAAACCCGAGCCCCAT    | 21 |
| <i>VmAP2/ERF054-F1</i> | GCAACATCAACAACATCATCCTC  | 22 |
| <i>VmAP2/ERF054-R1</i> | CTTCCGTTATCGTGCTACTCTC   | 22 |
| <i>VmAP2/ERF055-F1</i> | TAGAGCAGCCTAATAAAAAGA    | 21 |
| <i>VmAP2/ERF055-R1</i> | CCATTATCCAAAGTGAATCAAACA | 24 |
| <i>VmAP2/ERF057-F1</i> | TCAAACCTGAACCTAACGGAGTCG | 22 |
| <i>VmAP2/ERF057-R1</i> | GCGGTATCTTCTCGAAGACGA    | 21 |

**Table S5.** Pearson correlation ( $r$ ) between transcriptome data and qRT-PCR result of selected orthologous genes in *V. fordii* and *V. montana*.

| #  | GeneticName         | $r$   |
|----|---------------------|-------|
| 1  | <i>VfAP2/ERF012</i> | 0.875 |
| 2  | <i>VfAP2/ERF022</i> | 0.574 |
| 3  | <i>VfAP2/ERF043</i> | 0.997 |
| 4  | <i>VfAP2/ERF054</i> | 0.996 |
| 5  | <i>VfAP2/ERF031</i> | 0.986 |
| 6  | <i>VfAP2/ERF027</i> | 0.997 |
| 7  | <i>VfAP2/ERF047</i> | 0.718 |
| 8  | <i>VfAP2/ERF058</i> | 0.685 |
| 9  | <i>VfAP2/ERF044</i> | 0.825 |
| 10 | <i>VfAP2/ERF045</i> | 0.048 |
| 11 | <i>VfAP2/ERF053</i> | 0.732 |
| 12 | <i>VmAP2/ERF007</i> | 0.999 |
| 13 | <i>VmAP2/ERF019</i> | 0.978 |
| 14 | <i>VmAP2/ERF044</i> | 0.994 |
| 15 | <i>VmAP2/ERF056</i> | 0.993 |
| 16 | <i>VmAP2/ERF032</i> | 0.96  |
| 17 | <i>VmAP2/ERF027</i> | 0.361 |
| 18 | <i>VmAP2/ERF050</i> | 0.994 |
| 19 | <i>VmAP2/ERF062</i> | 0.947 |
| 20 | <i>VmAP2/ERF046</i> | 0.337 |
| 21 | <i>VmAP2/ERF047</i> | 0.978 |
| 22 | <i>VmAP2/ERF055</i> | 0.968 |
